# Supplementary material for: CHN nanocomposites and nanocoating resist enamel white spot lesions by enhancing remineralization and antibacterial activity
Source: Royal Society of Chemistry journal article supplement (doi:10.1039/d4ra01143k), 2024-01-01
Supplement: d4ra01143k1.pdf [file d4ra01143k1.pdf]

## Supporting Information

### **CHN Nanocomposites and Nanocoating Resist Enamel White Spot Lesions by Enhancing Remineralization and Antibacterial Activity**

Lihui Wang<sup>a</sup>, Shuqiang Niu<sup>b</sup>, Shanshan Xu<sup>b</sup>, Yanling Yu<sup>b\*</sup>, Yuanping Hao<sup>b\*</sup>

<sup>a</sup> School of Shandong Second Medical University, Weifang 261053, Shandong, China.

<sup>b</sup> Qingdao Stomatological Hospital Affiliated to Qingdao University, Qingdao 266001, Shandong, China.

E-mail addresses: qdkqyyl@163.com (Y. Yu), yphao@qdu.edu.cn (Y. Hao)

Tel.: +86-186-6195-0867 (Y.Y.); +86-166-2238-0102 (Y.H.); Fax: +86-0532-82796465 (Y.H.)

## Supporting Figures

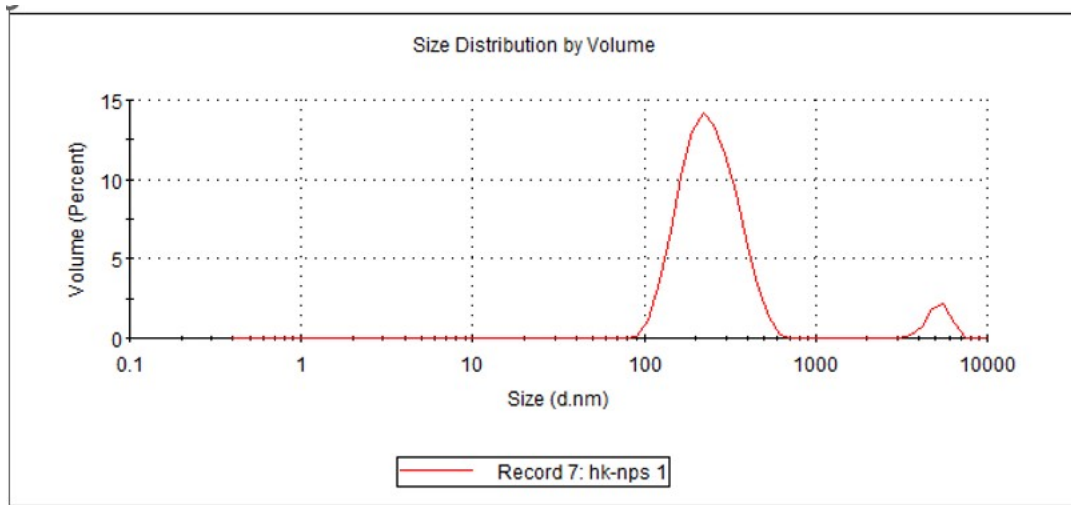

### S.1 Particle size distribution of HK-NPs

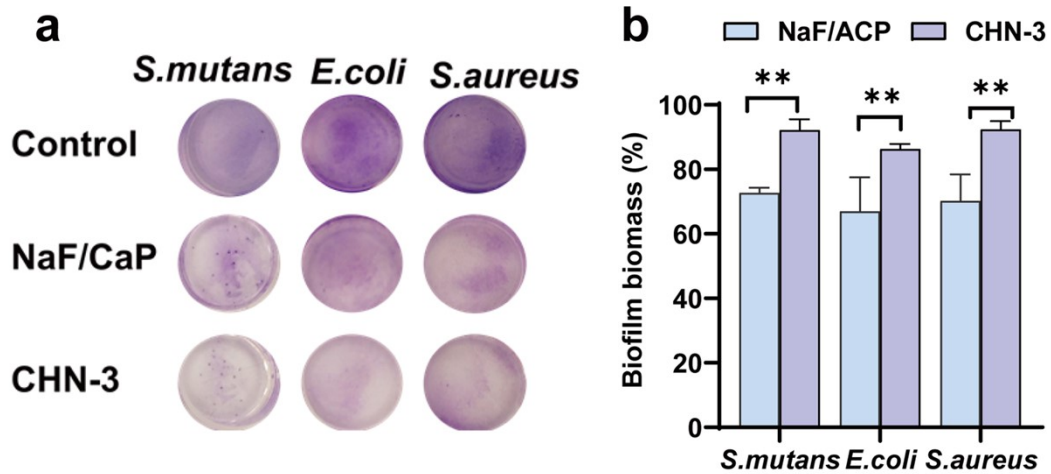

### S.2 (a) Crystal Violet (CV) staining images (b) corresponding quantitative bar graphs.

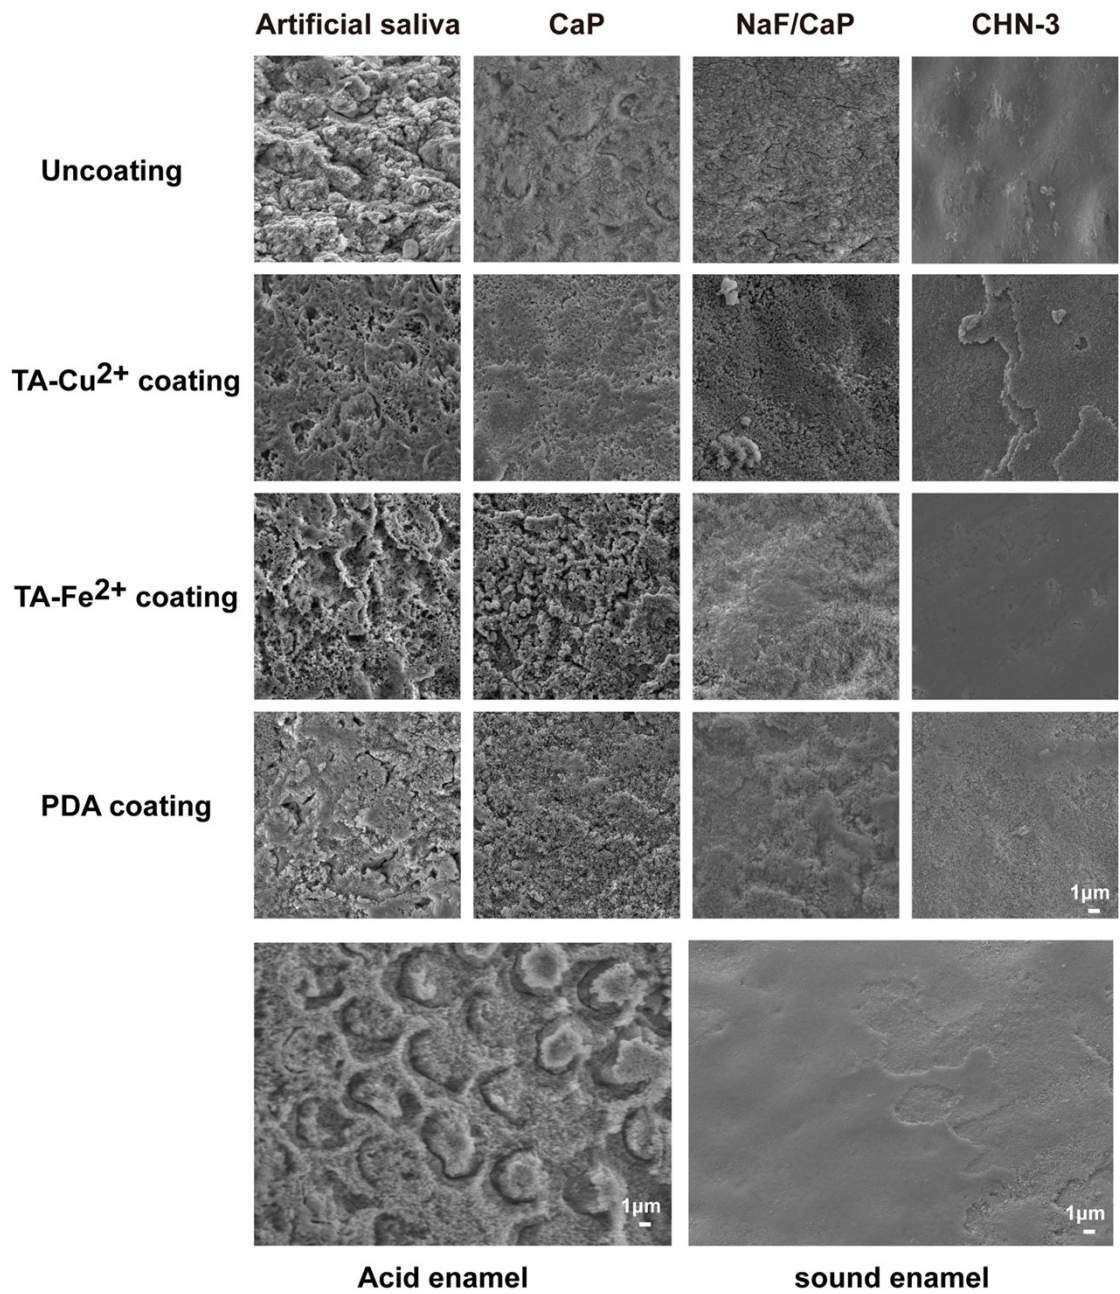

**S.3** Scanning electron microscope (SEM) images of tooth enamel after different treatments

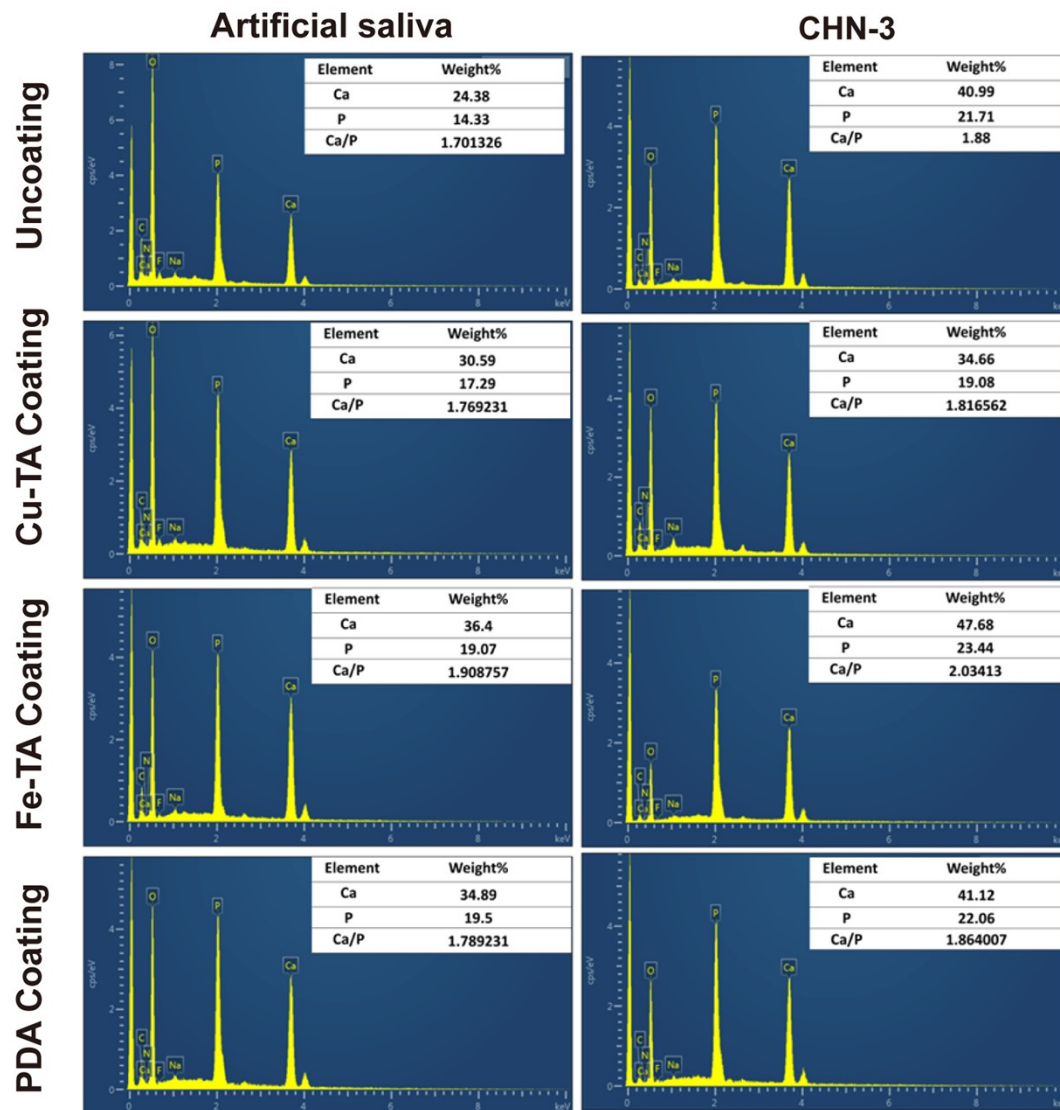

S.4 EDS images of tooth enamel after different treatments
